# Supplementary material for: Poly(ionic liquid)–polyoxometalate/graphene oxide composites as catalysts for deep desulfurization
Source: Royal Society of Chemistry journal article supplement (doi:10.1039/d1nj03493f), 2021-11-23
Supplement: d1nj03493f1.pdf [file d1nj03493f1.pdf]

Table S1 the base information of all used materials

|                      | Name                   | Chemical formula                              | Purity (%) | Supplier     |
|----------------------|------------------------|-----------------------------------------------|------------|--------------|
| Polymer ionic liquid | 1-Vinylimidazole       | C <sub>5</sub> H <sub>6</sub> N <sub>2</sub>  | 99%        | Aladdin      |
|                      | Ethyl bromide          | C <sub>2</sub> H <sub>5</sub> Br              | 99%        | Aladdin      |
|                      | Propyl bromide         | C <sub>3</sub> H <sub>7</sub> Br              | 99%        | Aladdin      |
|                      | Butyl bromide          | C <sub>4</sub> H <sub>9</sub> Br              | 99%        | Aladdin      |
|                      | Amyl bromide           | C <sub>5</sub> H <sub>11</sub> Br             | 99%        | Aladdin      |
|                      | Hexyl bromide          | C <sub>6</sub> H <sub>13</sub> Br             | 99%        | Aladdin      |
|                      | Azodiisobutyronitrile  | C <sub>8</sub> H <sub>12</sub> N <sub>4</sub> | 99%        | J&K Chemical |
| GO                   | Graphite               | C                                             | 99.8%      | Aladdin      |
|                      | Sodiumnitrate          | NaNO <sub>3</sub>                             | 99%        | supplier     |
|                      | Potassium permanganate | KMnO <sub>4</sub>                             | 99.5%      | supplier     |
|                      | Hydrogen peroxide      | H <sub>2</sub> O <sub>2</sub>                 | 30%        | supplier     |
| Model fuel           | N-octane               | C <sub>8</sub> H <sub>18</sub>                | 99.9%      | supplier     |
|                      | Thiophene              | C <sub>4</sub> H <sub>4</sub> S               | 99%        | supplier     |
|                      | Benzothiophene         | C <sub>8</sub> H <sub>6</sub> S               | 99%        | Aladdin      |
|                      | Dibenzothiophene       | C <sub>12</sub> H <sub>8</sub> S              | 99%        | Aladdin      |

Table S2 BBD experiment design and response result for desulfurization of thiophene

| Run | Factors       |        |               |                  | Experimental |
|-----|---------------|--------|---------------|------------------|--------------|
|     | A:Temperature | B:Mass | C:Oxygen flux | D:Stirring speed |              |
|     | (°C)          | (g)    | (L/min)       | (rpm)            |              |
| 1   | 60            | 0.08   | 0.5           | 1000             | 89.91        |
| 2   | 30            | 0.11   | 1             | 600              | 84.32        |
| 3   | 60            | 0.08   | 0.5           | 200              | 78.3         |
| 4   | 90            | 0.08   | 1             | 200              | 81.68        |
| 5   | 30            | 0.08   | 1.5           | 600              | 85.11        |
| 6   | 90            | 0.08   | 0.5           | 600              | 87.51        |
| 7   | 30            | 0.08   | 1             | 200              | 89.44        |

|    |    |      |     |      |       |
|----|----|------|-----|------|-------|
| 8  | 60 | 0.08 | 1   | 600  | 97.34 |
| 9  | 60 | 0.05 | 0.5 | 600  | 83.57 |
| 10 | 60 | 0.05 | 1   | 200  | 76.94 |
| 11 | 60 | 0.11 | 1   | 1000 | 93.05 |
| 12 | 60 | 0.11 | 1.5 | 600  | 91.96 |
| 13 | 60 | 0.08 | 1   | 600  | 97.79 |
| 14 | 60 | 0.08 | 1   | 600  | 98.02 |
| 15 | 60 | 0.11 | 0.5 | 600  | 89.33 |
| 16 | 60 | 0.11 | 1   | 200  | 84.79 |
| 17 | 90 | 0.11 | 1   | 600  | 89.36 |
| 18 | 60 | 0.08 | 1   | 600  | 98.12 |
| 19 | 60 | 0.05 | 1.5 | 600  | 84.7  |
| 20 | 60 | 0.05 | 1   | 1000 | 88.07 |
| 21 | 30 | 0.05 | 1   | 600  | 78.19 |
| 22 | 30 | 0.08 | 1   | 1000 | 83.61 |
| 23 | 30 | 0.08 | 0.5 | 600  | 77.43 |
| 24 | 90 | 0.08 | 1.5 | 600  | 91.71 |
| 25 | 90 | 0.08 | 1   | 1000 | 89.96 |
| 26 | 90 | 0.05 | 1   | 600  | 86.43 |
| 27 | 60 | 0.08 | 1   | 600  | 97.64 |
| 28 | 60 | 0.08 | 1.5 | 200  | 85.69 |
| 29 | 60 | 0.08 | 1.5 | 1000 | 94.76 |

Table S3 Analysis of variance (ANOVA) results for removal thiophene

| Source        | Sum of Squares | df | Mean Square | F-value | p-value |             |
|---------------|----------------|----|-------------|---------|---------|-------------|
| Model         | 1028.08        | 14 | 73.43       | 8.66    | 0.0001  | significant |
| A-temperature | 67.93          | 1  | 67.93       | 8.01    | 0.0133  |             |
| B-m           | 101.56         | 1  | 101.56      | 11.98   | 0.0038  |             |
| C-oxygen flux | 64.77          | 1  | 64.77       | 7.64    | 0.0152  |             |

---

|                  |         |    |        |        |          |             |
|------------------|---------|----|--------|--------|----------|-------------|
| D-stirring speed | 150.66  | 1  | 150.66 | 17.78  | 0.0009   |             |
| AB               | 2.56    | 1  | 2.56   | 0.3020 | 0.5913   |             |
| AC               | 3.03    | 1  | 3.03   | 0.3572 | 0.5596   |             |
| AD               | 49.77   | 1  | 49.77  | 5.87   | 0.0295   |             |
| BC               | 0.5625  | 1  | 0.5625 | 0.0664 | 0.8005   |             |
| BD               | 2.06    | 1  | 2.06   | 0.2430 | 0.6297   |             |
| CD               | 1.61    | 1  | 1.61   | 0.1903 | 0.6693   |             |
| A <sup>2</sup>   | 306.42  | 1  | 306.42 | 36.15  | < 0.0001 |             |
| B <sup>2</sup>   | 243.59  | 1  | 243.59 | 28.74  | 0.0001   |             |
| C <sup>2</sup>   | 160.18  | 1  | 160.18 | 18.90  | 0.0007   |             |
| D <sup>2</sup>   | 192.09  | 1  | 192.09 | 22.66  | 0.0003   |             |
| Residual         | 118.66  | 14 | 8.48   |        |          |             |
| Lack of Fit      | 118.27  | 10 | 11.83  | 122.41 | 0.0002   | significant |
| Pure Error       | 0.3865  | 4  | 0.0966 |        |          |             |
| Cor Total        | 1146.74 | 28 |        |        |          |             |

---
